# Supplementary material for: Zinc Plating on Inkjet-Printed Ti3C2Tx MXene: Effect of Electrolyte and PEG Additive
Source: MDPI journal article supplement (doi:10.3390/app14020682), 2024-01-13
Supplement: s1 [file s1]

Archive with 1 entries (1 files):
- applsci-2795693-supplementary.pdf
